# Supplementary material for: Aging and stress explain the earlier start of leaf senescence in trees in warmer years: translating the latest findings on senescence regulation into the DP3 model (v1.1)
Source: Copernicus journal article supplement (doi:10.5194/gmd-18-6963-2025), 2025-10-10
Supplement: Supplementary file 1 [file gmd-18-6963-2025-supplement.pdf]

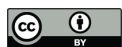

## *Supplement of*

# **Aging and stress explain the earlier start of leaf senescence in trees in warmer years: translating the latest findings on senescence regulation into the DP3 model (v1.1)**

**Michael Meier et al.**

*Correspondence to:* Michael Meier ([michael.meier.1@unil.ch](mailto:michael.meier.1@unil.ch))

The copyright of individual parts of the Supplement might differ from the article licence.

## S1 Data

### S1.1 Phenological data

#### S1.1.1 Coordinate transformation

The coordinates of the Swiss sites (Swiss phenology network, 2025) were transformed from the Swiss LV03 North and East projections ( $x$  and  $y$  [m]) to WGS84 latitude and longitude ( $\phi$  and  $\lambda$  [°], respectively; Eqs. S1–S6; Sect. 2 in Geodesy, 2016):

$$x' = (x - 200000 \text{ m}) / 1000000 \quad (\text{S1})$$

$$y' = (y - 600000 \text{ m}) / 1000000 \quad (\text{S2})$$

$$\phi' = 2.6779094 + 4.728982 y' + 0.791484 y' x' + 0.1306 y' x'^2 - 0.0436 y'^3 \quad (\text{S3})$$

$$\lambda' = 16.9023892 + 3.238272 x' - 0.270978 y'^2 - 0.002528 x'^2 - 0.0447 y'^2 x' - 0.0140 x'^3 \quad (\text{S4})$$

$$\phi = \phi' / 0.36 \quad (\text{S5})$$

$$\lambda = \lambda' / 0.36 \quad (\text{S6})$$

#### S1.1.2 Relationship with latitude, longitude, and elevation

We related the average leaf senescence date per site to latitude, longitude, and elevation through linear regression models fitted separately for the average day of year when 50% and 100% of the leaves having turned color or having fallen (average LS<sub>50</sub> and average LS<sub>100</sub>, respectively; Eq. S7; using the function `lm` in the R package `stats`; R Core Team, 2025):

$$\mathbf{y} = \mathbf{X}\boldsymbol{\beta} + \boldsymbol{\epsilon} \quad (\text{S7})$$

$\mathbf{y}$  is the  $n_j$ -dimensional vector of the response variables average LS<sub>50</sub> and average LS<sub>100</sub>, where  $j$  refers to either response variable and  $n_j$  is the corresponding number of observations.  $\mathbf{X}$  is the  $n_j \times 4$  matrix with the values of the first column being set to 1 (for the intercept) and the 2<sup>nd</sup> to 4<sup>th</sup> columns containing the respective explanatory variables latitude [°], longitude [°], and elevation [m a.s.l.].  $\boldsymbol{\epsilon}$  is the  $n_j$ -dimensional vector of normally distributed errors with  $N(0, \sigma_j^2)$ . Thus,  $\boldsymbol{\beta}$  is the 4-dimensional vector of the coefficient estimates for the intercept, latitude, longitude, and elevation.

The linear regression models revealed earlier average leaf senescence dates (i.e., aLS<sub>50</sub> and aLS<sub>100</sub>) with increasing latitude, increasing longitude, and increasing elevation (Table S1). Inline with recent research, this translates into earlier leaf senescence with cooler and more continental climatic conditions as well as with longer days during summer and faster decrease in day length between summer solstice and winter solstice (e.g., Kloos et al., 2024; Wang et al., 2022; but see Lu and Keenan, 2022).

**Table S1. Coefficient estimates of the linear regression models**

| Response                        | Explanatory          | Estimate | Standard error | <i>t</i> statistic | <i>p</i> -value | Adjusted R <sup>2</sup> |
|---------------------------------|----------------------|----------|----------------|--------------------|-----------------|-------------------------|
| average LS <sub>50</sub> [doy]  | Intercept            | 386.35   | 21.13          | 18.2837            | 0.000000        | 0.4761                  |
|                                 | Latitude [°]         | -1.69    | 0.40           | -4.2079            | 0.000036        |                         |
|                                 | Longitude [°]        | -1.61    | 0.15           | -10.9693           | 0.000000        |                         |
|                                 | Elevation [m a.s.l.] | -0.0142  | 0.0031         | -4.5542            | 0.000008        |                         |
| average LS <sub>100</sub> [doy] | Intercept            | 374.87   | 36.49          | 10.2731            | 0.000000        | 0.7614                  |
|                                 | Latitude [°]         | -0.95    | 0.70           | -1.3631            | 0.175860        |                         |
|                                 | Longitude [°]        | -1.62    | 0.27           | -5.9722            | 0.000000        |                         |
|                                 | Elevation [m a.s.l.] | -0.0219  | 0.0049         | -4.4497            | 0.000022        |                         |

Note: The linear regression models were fitted separately to the response variables average LS<sub>50</sub> and average LS<sub>100</sub> (i.e., the day of year [doy] when respective 50% and 100% of the leaves having turned color or having fallen). The coefficient estimates of the explanatory variables are given together with the corresponding standard errors, *t* statistic, and *p*-values. The adjusted R<sup>2</sup> is given for each model.

## S1.2 Driver calculations

### S1.2.1 Day length

Day length ( $L_{doy}$ ) for a given day of year ( $doy$  [d]) was calculated from latitude ( $\varphi$ ; [°]) according to Eqs. 1, 3, and 4 in Brock (1981; Eqs. S8–S10):

$$L_{doy} = 2 \frac{W_{doy}}{15^\circ \text{h}^{-1}} \quad (\text{S8})$$

$$W_{doy} = \arccos(-\tan(\varphi) * \tan(\gamma_{doy})) \quad (\text{S9})$$

$$\gamma_{doy} = 23.45^\circ \sin(360^\circ (doy - 81)/365) \quad (\text{S10})$$

With  $\gamma_{doy}$  and  $W_{doy}$  being the respective declination [°] and hour-angle [°] at sunrise at  $doy$ .

### S1.2.2 Photosynthetic activity

Sink limited daily net photosynthetic activity ( $A_{net}$  [mol C d<sup>-1</sup>]; Eq. S11; Collatz et al., 1991) was calculated as the difference between the gross photosynthetic activity ( $A_{grs}$  [mol C d<sup>-1</sup>]) and respiration ( $R$  [mol C d<sup>-1</sup>]; Collatz et al., 1991; Farquhar et al., 1980; Wohlfahrt and Gu, 2015).

$$A_{net} = A_{grs} - R \quad (\text{S11})$$

$A_{grs}$  in turn depended on photon availability ( $J_E$  [mol C d<sup>-1</sup>]), Rubisco activity ( $J_C$  [mol C d<sup>-1</sup>]), and sink capacity ( $J_S$  [mol C d<sup>-1</sup>]; Eq. S12), while  $R$  was defined as a fraction of the maximum photosynthetic rate ( $V_{max}$  [mol C d<sup>-1</sup>]; Eq. S13).

$$A_{grs} = \max \left( 0, L \times \frac{J_P + J_S - \sqrt{(J_P + J_S)^2 - 4\beta_C J_P J_S}}{2\beta_C} \right) \quad (\text{S12})$$

$$R = b_{C3} V_{max} \quad (S13)$$

$J_P$  is an intermediate variable, combining  $J_E$  and  $J_C$  (Eq. S14),  $\beta_C$  is a constant shape parameter, and  $b_{C3}$  is a constant fraction for C3 plants (Table S1).

$$J_P = \frac{J_C + J_E - \sqrt{(J_C + J_E)^2 - 4\theta_C J_E J_C}}{2\theta_C} \quad (S14)$$

$\theta_C$  is a constant shape parameter (Table S1).  $J_E$  and  $J_C$  are daily fractions of the available photosynthetically active radiation ( $APAR$  [ $W\ m^{-2}$ ]; Eq. S15) and  $V_{max}$  (Eq. S16), respectively, while  $J_S$  is a constant fraction of  $V_{max}$  (Eq. S17).

$$J_E = C_1 \times \frac{APAR}{L} \quad (S15)$$

$$J_C = C_2 \times \frac{V_{max}}{24[h]} \quad (S16)$$

$$J_S = 0.5 \times \frac{V_{max}}{24[h]} \quad (S17)$$

$L$  is the day length [h], and  $V_{max}$  depends on  $APAR$  (Eq. S18), which in turn was calculated as a fraction ( $f_{apar}$ ) of the photosynthetically active radiation ( $PAR$  [ $W\ m^{-2}$ ]; Eq. S19).

$$V_{max} = \frac{1}{b_{C3}} \frac{C_1}{C_2} [(2\theta - 1)s - \sigma(2\theta s - C_2)] APAR \quad (S18)$$

$$APAR = \alpha_a c_q f_{apar} PAR (3600 \times 24)[s] \quad (S19)$$

$\theta$  is a constant shape parameter, while  $\alpha_a$  and  $c_q$  are a constant ratio and a constant conversion factor for the respective assimilation and conversion of solar radiation (Table S1). While  $f_{apar}$  depended on the leaf area index ( $LAI$ ; Eq. S20),  $PAR$  was derived from the surface shortwave down welling radiation ( $R_s$  [ $W\ m^{-2}$ ]; Eq. S21).

$$f_{apar} = 1 e^{-0.5 LAI} \quad (S20)$$

$$PAR = 0.5 R_s \quad (S21)$$

$V_{max}$  further depends on  $s$  and  $\sigma$  (Eqs. S22–S23) as well as on  $C_1$  and  $C_2$  (Eqs. S24–S25).

$$s = b_{C3} \frac{24[h]}{L} \quad (S22)$$

$$\sigma = \sqrt{1 - \frac{C_2 - s}{C_2 - \theta s}} \quad (S23)$$

$$C_1 = \phi_C \alpha_{C3} f(T) \times \frac{p_{i,CO_2} - \Gamma^*}{p_{i,CO_2} + 2\Gamma^*} \quad (S24)$$

$$C_2 = \frac{(p_{i,CO_2} - \Gamma^*)}{p_{i,CO_2} + K_C (1 + \frac{p_{a,O_2}}{K_O})} \quad (S25)$$

$\alpha_{C3}$  describes the quantum efficiency of C3 plants, and  $p_{a,O_2}$  is the ambient partial O<sub>2</sub> pressure (Table S1).  $p_{i,CO_2}$  is the internal partial CO<sub>2</sub> pressure (Eq. S26),  $\Gamma^*$  is the CO<sub>2</sub> condensation point (Eq. S27),  $K_C$  and  $K_O$  are the kinetic coefficients for CO<sub>2</sub> (Eq. S28) and O<sub>2</sub> (Eq. S29), respectively, and  $f(T)$  is a function of the mean temperature (Eq. S30).

$$p_{i,CO_2} = \lambda_{C3} [CO_2]_A 10^{-16} p_0 \quad (S26)$$

$$\Gamma^* = \frac{p_{a,O_2}}{2\tau q_{\tau 10}^{(T-25K)/10}} \quad (S27)$$

$$K_C = k_C q_{C10}^{(T-25K)/10} \quad (S28)$$

$$K_O = k_O q_{O10}^{(T-25K)/10} \quad (S29)$$

$$f(x) = \min \left( 1, \max \left( 0, \frac{1}{1 + e^{k_1(k_2 - T)}} \times (1 - 0.01 e^{k_3(T - x_3)}) \right) \right) \quad (S30)$$

$\lambda_{C3}$  is the optimal ratio of internal to ambient CO<sub>2</sub> pressure of C3 plants.  $\tau$ ,  $k_C$ , and  $k_O$  are the specificity ratio CO<sub>2</sub>:O<sub>2</sub> and the Michaelis constants for CO<sub>2</sub> and O<sub>2</sub>, respectively, while  $q_{\tau 10}$ ,  $q_{C10}$ , and  $q_{O10}$  are the corresponding rates of change due to a 10 K change in mean temperature ( $T$  [°C]).  $k_1$ ,  $k_2$ , and  $k_3$  are derived from the cardinal temperatures  $x_1$ ,  $x_2$ ,  $x_3$ , and  $x_4$  (Eqs. S31–S33, Table S1).

$$k_1 = \frac{2 \log(1/0.99 - 1)}{x_1 - x_2} \quad (S31)$$

$$k_2 = (x_1 + x_2)/2 \quad (S32)$$

$$k_3 = \log \left( \frac{0.99/0.01}{x_4 - x_3} \right) \quad (S33)$$

**Table S2. Constants.**

| Constant       | Value                | Description                                                                                   | Source                               |
|----------------|----------------------|-----------------------------------------------------------------------------------------------|--------------------------------------|
| $\beta_C$      | 0.95                 | Fraction; Co-limitation (shape) parameter for $J_P$ and $J_S$                                 | Co97, Eq. (A9)                       |
| $b_{C3}$       | 0.015                | Fraction; Leaf respiration per maximum Rubisco capacity for C3 plants                         | HP96, Table 2                        |
| $\theta_C$     | 0.98                 | Fraction; Co-limitation (shape) parameter for $J_C$ and $J_E$                                 | Co97, Eq. (A8)                       |
| $\theta$       | 0.7                  | Fraction; Alternative co-limitation (shape) parameter for $J_C$ and $J_E$                     | Table 2 in HP96                      |
| $\alpha_a$     | 0.5                  | Ratio; Assimilated PAR from ecosystem to leaf level                                           | Table 4 in Si00                      |
| $c_q$          | $4.6 \times 10^{-6}$ | [E J <sup>-1</sup> ], [mol J <sup>-1</sup> ]; Conversion factor for solar radiation at 550 nm |                                      |
| $\alpha_{C3}$  | 0.08                 | Intrinsic quantum efficiency of CO <sub>2</sub> uptake in C3 plants                           | Ha96; Si00                           |
| $p_0$          | $1.013 \times 10^5$  | [Pa]; Standard pressure                                                                       | -                                    |
| $P_{a,O2}$     | $0.209 \times p_0$   | [Pa]; Ambient O <sub>2</sub> pressure                                                         | Table A1 in Co97;<br>Table 2 in HP96 |
| $\lambda_{C3}$ | 0.8                  | Fraction                                                                                      | Ge04                                 |
| $\tau$         | 2600                 | Ratio; CO <sub>2</sub> :O <sub>2</sub> specificity ratio                                      | Table A1 in Ca91                     |
| $k_O$          | $3 \times 10^4$      | [Pa]; Michaelis constant for O <sub>2</sub>                                                   | Table A1 in Co97;<br>Table 2 in HP96 |
| $k_C$          | 30                   | [Pa]; Michaelis constant for CO <sub>2</sub>                                                  |                                      |
| $q_{t10}$      | 0.57                 | Fraction; Temperature-sensitivity of $\tau$ regarding a change of 10 K                        | Table A1 in Ca91                     |
| $q_{O10}$      | 1.2                  | Fraction; Temperature-sensitivity of $k_O$ regarding a change of 10 K                         | Table A1 in Co97;<br>Table 2 in HP96 |
| $q_{C10}$      | 1.2                  | Fraction; Temperature-sensitivity of $k_C$ regarding a change of 10 K                         |                                      |
| $x_1$          | 1                    | [°C]; Cardinal temperatures                                                                   | Eqs. S10–S15 in<br>Za20              |
| $x_2$          | 18                   |                                                                                               |                                      |
| $x_3$          | 25                   |                                                                                               |                                      |
| $x_4$          | 45                   |                                                                                               |                                      |

*Note:* These constants were taken from the following sources: Co91: (Collatz et al., 1991); Ge04: (Gerten et al., 2004); Ha96: (Haxeltine et al., 1996); HP96: (Haxeltine and Prentice, 1996); Si00: (Sitch et al., 2000); Za20: (Zani et al., 2020).

### S1.2.3 Keetch and Byram drought index

The Keetch and Byram drought index for day  $i$  ( $Q_i$ ; Eq. S34) was calculated from daily precipitation ( $P_i$ ) and daily maximum temperature ( $Tx_i$ ; Keetch and Byram, 1968), which were converted from millimeters [mm] to inches [in] and from degree Celsius [°C] to degree Fahrenheit [°F], respectively ( $P'_i$  and  $Tx'_i$ ; Eqs. S35–S36; Foster et al., 1981, Table 2; Shaw, 1931; Woods, 1931):

$$Q_i = \min(800, \max(0, Q_{Base,i} + \Delta Q_i)) \quad (S34)$$

$$P'_i = \frac{P_i}{25.4} [\text{mm in}^{-1}] \quad (S35)$$

$$Tx'_i = 9/5 [^\circ\text{F } ^\circ\text{C}^{-1}] \times Tx_i + 32 [^\circ\text{F}] \quad (S36)$$

The base index ( $Q_{base,i}$ ) was derived from  $Q$  of the previous day (i.e.,  $Q_{i-1}$ ) and the net precipitation of the given day ( $P_{net,i}$  [in]; Eq. S37), while the daily drought factor ( $\Delta Q_i$ ) was calculated from the base index ( $Q_{base,i}$ ),  $Tx'_i$ , and mean annual rainfall ( $R_i$ , [in]; Eqs. S38–S39):

$$Q_{Base,i} = \max(0, Q_{i-1} - 100 P_{net,i}) \quad (S37)$$

$$\Delta Q_i = (800 - Q_{Base,i}) \times \frac{0.968 e^{0.0486 Tx'_i} - 0.83}{1 + 10.88 e^{-0.0441 R_i}} \times 0.001 \quad (S38)$$

$$R_i = \frac{1}{366} \sum_{j=i-355}^i P'_j \quad (S39)$$

Here,  $Q_{Base,1}$  (i.e., of January 1<sup>st</sup>, 1950) was set to the average  $Q_{Base}$  during the Decembers and Januaries of 1955–1959,  $R_1, R_2, \dots, R_{355} = R_{366}$ , and  $P'_i = 0$  if the precipitation fell as snow (i.e., if the mean temperature  $T_i \leq 0$  °C).  $P_{net}$  depends on  $P'$  of the given and two previous days in comparison to a threshold precipitation of 0.2 in ( $Y_P$ ; Eq. S40).

$$P_{net,i} = \begin{cases} \max(0, P'_i - Y_P) & , \text{ if } P'_{i-1} = 0 \\ P'_i & , \text{ if } P'_{i-1} \geq Y_P \\ \max(0, \sum_{k=0}^1 P'_{i-k} - Y_P) & , \text{ if } P'_{i-1} < Y_P \wedge \sum_{k=1}^2 P'_{i-k} \geq Y_P \\ \max(0, \sum_{k=0}^2 P'_{i-k} - Y_P) & , \text{ if } P'_{i-1} < Y_P \wedge \sum_{k=1}^2 P'_{i-k} < Y_P \end{cases} \quad (S40)$$

The KBDI was initiated per site, i.e., setting  $Q_i$  to zero after the first period of either abundant precipitation or snow melt during 1950–1954 (Keetch and Byram, 1968). A period of abundant precipitation was defined as seven consecutive days during which the precipitation sum was six inches (i.e., 152.4 mm; see Eq. S34) or more. A period of snow melt was defined as four consecutive days during which the snow melt followed on at least seven days with snow fall. For this, we defined day  $i$  as a day with snow melt when  $T_i > 0$  °C and as a day with snow fall when  $P_i > 0$  mm and  $T_i \leq 0$  °C.

## S2 Methods

### S2.1 Initial ranges for parameters

**Table S3. Ranges for parameter calibration**

| Symbol               | Meaning                                                                         | Boundaries                                             |
|----------------------|---------------------------------------------------------------------------------|--------------------------------------------------------|
| $-a_C$               | Boundary below which cold stress is 1 versus 0                                  | 0–30 °C                                                |
| $b_{0,C}$            | Boundary above which cold stress gradually increases from 0 to 1                | 0–30 °C                                                |
| $b_{1,C}$            | Boundary below which cold stress gradually decreases from 1 to 0                | $(b_{0,C}+0\text{ °C})-(b_{0,C}+20\text{ °C})$         |
| $-a_P$               | Boundary below which photoperiod stress is 1 versus 0                           | –0.25–+0.25 h                                          |
| $b_{0,P}$            | Boundary above which photoperiod stress gradually increases from 0 to 1         | –0.25–+0.25 h                                          |
| $b_{1,P}$            | Boundary below which photoperiod stress gradually decreases from 1 to 0         | $(b_{0,P}+0\text{ h})-(b_{0,P}+0.3\text{ h})$          |
| $a_D$                | Boundary above which dry stress is 1 versus 0                                   | 0–800                                                  |
| $-b_{0,D}$           | Boundary above which dry stress gradually increases from 0 to 1                 | 0–800                                                  |
| $-b_{1,D}$           | Boundary below which dry stress gradually decreases from 1 to 0                 | $(b_{0,D}+0)-(b_{0,D}+400)$                            |
| $a_R$                | Boundary above which rain stress is 1 versus 0                                  | 0–500 mm                                               |
| $-b_{0,R}$           | Boundary above which rain stress gradually increases from 0 to 1                | 0–500 mm                                               |
| $-b_{1,R}$           | Boundary below which rain stress gradually decreases from 1 to 0                | $(b_{0,R}+0\text{ mm})-(b_{0,R}+300\text{ mm})$        |
| $a_H$                | Boundary above which heat stress is 1 versus 0                                  | 25–50 °C                                               |
| $a_N$                | Boundary above which nutrient stress is 1 versus 0                              | 20–250 mol C d <sup>–1</sup>                           |
| $-a_F$               | Boundary below which frost stress is 1 versus 0                                 | –5–+10 °C                                              |
| $w_C$                | Weight of cold stress                                                           | 0–1                                                    |
| $w_P$                | Weight of photoperiod stress                                                    | 0–1                                                    |
| $w_D$                | Weight of dry stress                                                            | 0–1                                                    |
| $w_R$                | Weight of rain stress                                                           | 0–1                                                    |
| $w_H$                | Weight of heat stress                                                           | 0–1                                                    |
| $w_N$                | Weight of nutrient stress                                                       | 0–1                                                    |
| $w_F$                | Weight of frost stress                                                          | 0–1                                                    |
| $w_A$                | Weight of aging rate                                                            | 0–1                                                    |
| $w_S$                | Weight of stress rate                                                           | 0–1                                                    |
| $s_X$                | Scaling factor of the senescence rate                                           | 0–1                                                    |
| $x_S$                | Shape parameter of the stress rate                                              | 0–10                                                   |
| $c$                  | First parameter of exponential function                                         | 0.005–0.5                                              |
| $d$                  | Second parameter of exponential function                                        | 0–15                                                   |
| $Y_{\text{Aging},1}$ | Threshold for the aging state, marking the transition from young to mature leaf | 0–50 d                                                 |
| $Y_{\text{Aging},2}$ | Threshold for the aging state, marking the transition from mature to old leaf   | $Y_{\text{Aging},1}-(Y_{\text{Aging},1}+250\text{ d})$ |
| $Y_{\text{LS}100}$   | Threshold for the senescence state, indicating the day of LS <sub>100</sub>     | 0–10                                                   |

*Note:* The symbols of the parameters for the boundaries below or above which stress occurs [ $a$ ; see response function  $g(x)$ ; Eq. 7], for the boundaries between which stress occurs [ $b_0$  and  $b_1$ ; see response function  $h(x)$ ; Eq. 8], and for the weights ( $w$ ) that define the stress rate as well as for the different formulations of the senescence rate ( $w_A$ ,  $w_S$ ,  $s_X$ ,  $x_S$ ,  $c$ , and  $d$ ; Eq. 9) and the thresholds ( $Y$ ) that mark the transitions from young to mature leaf, the transition from mature to old leaf and the time when 100% of the leaves having changed color or having fallen ( $LS_{100}$ ).

### S2.2 Controls of the simulated annealing algorithm

The choice of the controls for the optimization algorithm influences the accuracy of the calibrated model (Meier and Bigler, 2023) through the exploration–exploitation trade-off (Candelieri, 2021; Maes et al., 2013). Thus, we set the controls ‘maximum iterations’, ‘maximum calls’, and ‘temperature’ of the generalized simulated annealing algorithm (Xiang et al., 1997, 2017) in such a way that the calibrated model resulted in most accurate predictions for the validation sample. To identify these optimal controls for each model and calibration sample, we calibrated each model four times (i.e., twice with each sample draw) with all 27 combinations of 4000, 5000, and 6000 maximum iterations,  $10^6$ ,  $10^7$ , and



$10^8$  maximum calls, as well as temperatures of 5200, 5230, and 5300. Thus, we used the combination of controls that resulted in the lowest average Akaike information criterion for small samples (i.e.,  $n < 40k$ ; AICc; Eq. S41; based on the validation sample; Akaike, 1974; Burnham and Anderson, 2004) to compute the additional six calibration runs (i.e., three per calibration sample; Table S4).

$$AICc = AIC + \frac{2k(k+1)}{n-k-1} \quad (S41)$$

$$AIC = -2 \times \log(L) + 2k \quad (S42)$$

$$\sigma_e = \sqrt{\frac{1}{n} \sum_{i=1}^n (x_{p,i} - x_{o,i})^2} \quad (S43)$$

$n$  is the number of predicted and observed doy pairs ( $x_p$  and  $x_o$ , respectively) and  $k$  is the number of free model parameters.  $L$  is the likelihood for the normally distributed model errors (i.e.,  $x_p - x_o$ ; Fisher and Russell, 1997) with  $N(0, \sigma_e)$ . In case  $S_{Senescence}$  did not reach the thresholds  $Y_{LS50}$  and  $Y_{LS100}$  until December 31<sup>st</sup>, corresponding  $x_p$  were considered missing and thus set to doy 367 before their accuracy was evaluated.

**Table S4. Optimal controls of the generalized simulated annealing algorithm.**

| Model | Sample                              | Maximum iterations | Maximum calls | Temperature |
|-------|-------------------------------------|--------------------|---------------|-------------|
| CDD   | LS <sub>50</sub>                    | 4000               | $10^8$        | 5300        |
| DM2   | LS <sub>50</sub>                    | 6000               | $10^6$        | 5300        |
| PIA   | LS <sub>50</sub>                    | 5000               | $10^7$        | 5200        |
| DP3   | LS <sub>50</sub>                    | 4000               | $10^8$        | 5300        |
|       | LS <sub>50</sub> -LS <sub>100</sub> | 5000               | $10^7$        | 5200        |

*Note:* Only the control settings for the evaluated models (LS<sub>50</sub> sample) and for the model that was selected through the iterations of model development (LS<sub>50</sub>-LS<sub>100</sub> sample) are shown. Those for the models that were rejected during model development are omitted.

### S2.3 Model calibration, selection, and evaluation

All models were calibrated by minimizing the root mean squared error (RMSE; Eq. S44).

$$RMSE = \sqrt{\frac{1}{n} \sum_{i=1}^n (x_{p,i} - x_{o,i})^2} \quad (S44)$$

Thus, for each model, we selected and further evaluated the calibration run that resulted in highest modified Kling-Gupta efficiency (KGE'; Eq. S45; Gupta et al., 2009; Kling et al., 2012) for the validation sample.

$$KGE' = 1 - \sqrt{(\rho - 1)^2 + (\beta - 1)^2 - (\gamma - 1)^2} \quad (S45)$$

$$\beta = \mu_p / \mu_o \quad (\text{S46})$$

$$\gamma = \frac{\sigma_p / \mu_p}{\sigma_o / \mu_o} \quad (\text{S47})$$

$\beta$  is the bias ratio,  $\gamma$  is the variability ratio, and  $\rho$  is the Pearson correlation between  $x_p$  and  $x_o$ .  $\mu_p$  and  $\mu_o$  are the respective predicted and observed mean day, and  $\sigma_p$  and  $\sigma_o$  are the corresponding standard deviations. For the perfect model (i.e.,  $x_p = x_o$  for all  $i$ ),  $\rho = 1$ ,  $\beta = 1$ , and  $\gamma = 1$ , and thus  $KGE' = 1$ , whereas  $1 > KGE' > -\infty$  for imperfect models.

## S2.4 Linear mixed-effects model and analysis of variance

We fitted a linear mixed-effects model (LMM; Eq. S48; Pinheiro and Bates, 2000; Wood, 2011, 2017) to analyze the effects on the model error:

$$\mathbf{y} = \mathbf{X}\boldsymbol{\beta} + \mathbf{Z}\mathbf{b} + \boldsymbol{\epsilon} \quad (\text{S48})$$

$\mathbf{y}$  is the  $n$ -dimensional vector of the response variable ‘model error’ (ME) and  $n$  is the corresponding number of ME.  $\mathbf{X}$  is the  $n \times p$  matrix of the intercept (i.e., 1) and the  $p - 1$  explanatory variables.  $\boldsymbol{\beta}$  is the corresponding  $p$ -dimensional vector of the fixed effects ‘country’ and ‘model’ as well as the annual and site-specific deviations in mean annual temperature, mean annual KBDI, accumulated  $A_{\text{net}}$  between LU and summer solstice, latitude, and elevation (CTR, MOD,  $\delta\text{MAT}$ ,  $\delta\text{MAQ}$ ,  $\delta A_{\text{net}}$ ,  $\delta\text{LAT}$  and  $\delta\text{ELV}$ , respectively) from the overall calibration sample means per variable.  $\mathbf{Z}$  is the  $n \times q$  matrix of the random effects, assigning the  $n$  observations to the  $q$  groups of the grouping variable ‘site’ (STE).  $\mathbf{b}$  is the corresponding  $q$ -dimensional vector of the random intercepts with  $\mathbf{b} \sim N(0, \sigma_b^2 \mathbf{I}_q)$ , and  $\boldsymbol{\epsilon}$  is the  $n$ -dimensional vector of the errors with  $\boldsymbol{\epsilon} \sim N(0, \sigma^2 \mathbf{I}_n)$  (Baayen et al., 2008; Chpt. 2.1 in Pinheiro and Bates, 2000; Chpt. 6.2 in Wood, 2017).

We fitted this LMM with the function `bam` in the R package `mgcv` (Wood, 2017), using the following formula (Eq. S49):

$$\text{ME} \sim \text{MOD} * (\delta\text{MAT} + \delta\text{MAQ} + \delta A_{\text{net}} + \delta\text{LAT} + \delta\text{ELV}) + \text{CTR} + \text{s}(\text{STE}, \text{bs} = \text{'re'}) \quad (\text{S49})$$

This LMM combined model effects interacting with effects due to climatic deviations from the calibration sample (red), spatial deviations from the calibration sample (green), and data structure (blue). The LMM was the basis for the type-III ANOVA (Yates, 1934), which we derived with the functions `aov` and `drop1` in the R package `stats` (Eq. S50; R Core Team, 2025):

$$\text{drop1}(\text{aov}(\text{LMM}), \text{scope} = \sim., \text{test} = \text{'F'}) \quad (\text{S50})$$

Thus, we calculated the amount of variation attributed to differences among each explanatory variable, i.e., the relative impact of given variable on the variance in the model error explained by the LMM, by dividing the variable-specific sum of squares by the total sum of squares over all variables.

## S3 Results

## S3.1 Formulation of the leaf development process

|                                                                                              | 1 <sup>st</sup> iteration                                                                    | 2 <sup>nd</sup> iteration    | 3 <sup>rd</sup> iteration                                                                                                                                                                                                    | 4 <sup>th</sup> iteration                                                                                                                    | 5 <sup>th</sup> iteration      | 6 <sup>th</sup> iteration                                |
|----------------------------------------------------------------------------------------------|----------------------------------------------------------------------------------------------|------------------------------|------------------------------------------------------------------------------------------------------------------------------------------------------------------------------------------------------------------------------|----------------------------------------------------------------------------------------------------------------------------------------------|--------------------------------|----------------------------------------------------------|
| Tested formulations of leaf development                                                      | 2_A_gCgPgD_P<br>2_D_gCgPgD_P<br>2_A_gCgPgD_S<br>2_D_gCgPgD_S<br>2_A_gCgPgD_X<br>2_D_gCgPgD_X | 3_D_gCgPgD_P<br>3_D_gCgPgD_X | 3_D_hCgPgD_P<br>3_D_gCgPgD_P<br>3_D_gCgPhD_P<br>3_D_hCgPgD_P<br>3_D_gCgPhD_P<br>3_D_hCgPhD_P<br>3_D_hCgPgD_X<br>3_D_gCgPgD_X<br>3_D_gCgPhD_X<br>3_D_hCgPgD_X<br>3_D_gCgPhD_X<br>3_D_hCgPhD_X<br>3_D_gCgPhD_X<br>3_D_hCgPhD_X | 3_D_gCgLgDgR_P<br>3_D_gCgLgDgH_P<br>3_D_gCgLgDgN_P<br>3_D_gCgLgDgF_P<br>3_D_gCgLgDgR_X<br>3_D_gCgLgDgH_X<br>3_D_gCgLgDgN_X<br>3_D_gCgLgDgF_X | 3_D_gCgLgDhR_P                 | 3_D_gCgLgDgRgH_P<br>3_D_gCgLgDgRgN_P<br>3_D_gCgLgDgRgF_P |
| Most accurate formulation across the 1 <sup>st</sup> to the <i>i</i> <sup>th</sup> iteration | 2_D_gCgPgD_P<br>2_D_gCgPgD_X                                                                 | 3_D_gCgPgD_P<br>3_D_gCgPgD_X | 3_D_gCgPgD_P<br>3_D_gCgPgD_X                                                                                                                                                                                                 | 3_D_gCgPgD_P<br>3_D_gCgPgDgR_P                                                                                                               | 3_D_gCgPgD_P<br>3_D_gCgPgDgR_P | 3_D_gCgPgD_P<br>3_D_gCgPgDgR_P                           |

**Figure S1. Tested models.** The tested models were labeled according to their formulation, namely as  $x_P\_x_A\_x_S\_x_X$ , with  $x_P$  being the number of leaf development phases (i.e., 2 or 3),  $x_A$  being the driver of the aging rate (i.e., A or D for photosynthesis or days, respectively),  $x_S$  being the stress rate in response [i.e., g or h for  $g(x)$  or  $h(x)$ ] to the stressors cold (C), shortening (P), dry (D), heat (H), and frost (F) days, heavy rain periods (R), and nutrient depletion (N), and  $x_X$  indicating the formulation of the senescence rate (i.e., S, P, or X when formulated as a sum, product, or exponential function of aging and stress, respectively). After each iteration, we identified the two most accurate models across the given and all previous iterations (Fig. 5, Sect. 2.5). These models were further developed through the next iteration. As soon as such a subsequent iteration did not produce any new model, we selected the most accurately formulated model among all iterations (bold; i.e., the ‘DP3’ model). All models were tested for beech based on the LS<sub>50</sub>-LS<sub>100</sub> sample (Sect. 2.4).

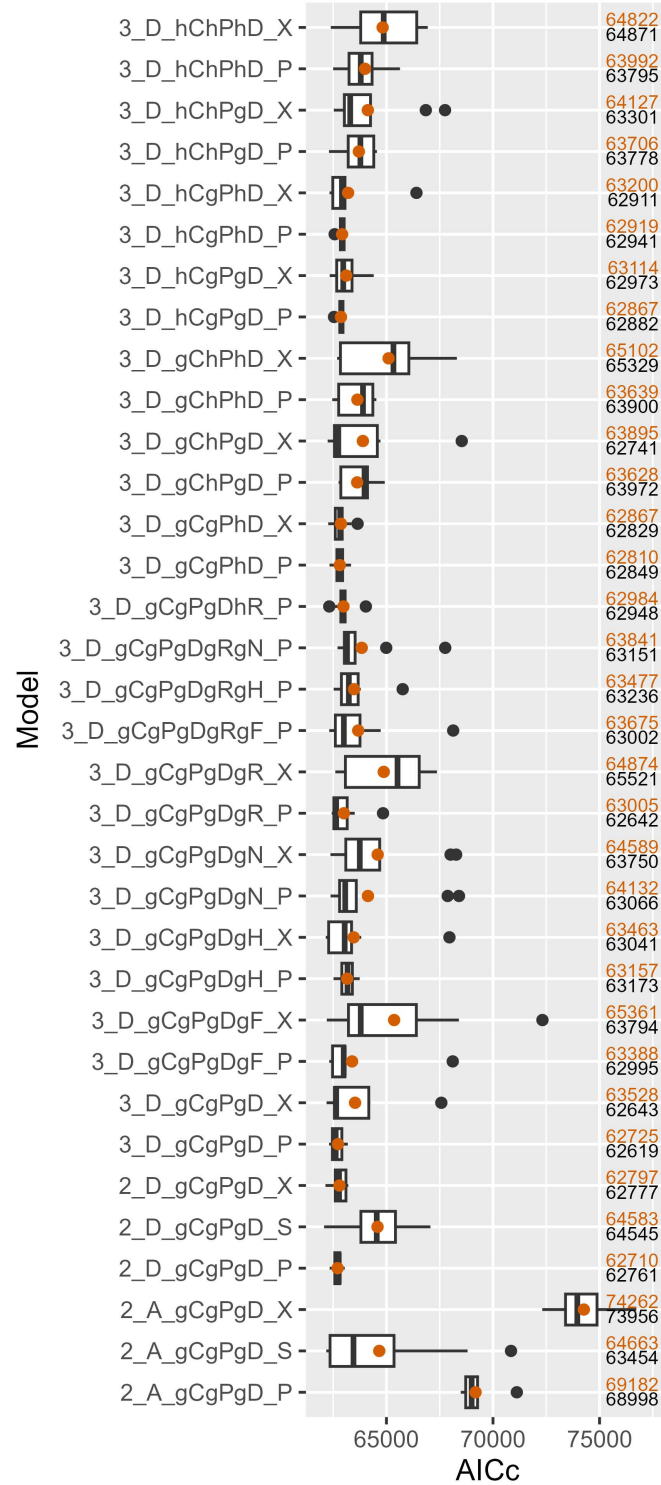

**Figure S2. Accuracy of the tested model formulations.** The accuracy was assessed with the Akaike information criterion for small samples (AICc; Eq. S40). The boxes indicate the inner quartile range and the median (middle line). The most extreme values are indicated with dots if outside  $\pm 1.5$  times the inner quartile range from the 1<sup>st</sup> and 3<sup>rd</sup> quartile, and with whiskers otherwise. Orange dots show the mean, which is further indicated in orange to the right of each box, together with the median indicated in black. The models were labeled as  $x_P x_A x_S x_X$ , with  $x_P$  being the number of leaf development phases (i.e., 2 or 3),  $x_A$  being the driver of the aging rate (i.e., A or D for photosynthesis or days, respectively),  $x_S$  being the stress rate that is the summed response [i.e., g or h for  $g(x)$  or  $h(x)$ ] to the stressors cold (C), shortening (P), dry (D), heat (H), and frost days (F), heavy rain periods (R), and nutrient depletion (N), and  $x_X$  indicating the formulation of the senescence rate (i.e., S, P, or X when formulated as a sum, product, or exponential function of aging and stress, respectively). All models were calibrated with the LS<sub>50</sub>-LS<sub>100</sub> sample (Sect. 2.4).

**Table S5. Senescence summarized across mean annual temperature**

| Calibration                         | Subject                     | Variable                  | 3.8–6.1 °C | 6.1–8.4 °C | 8.4–10.7 °C | 10.7–13.0 °C | 13.0–15.4 °C |
|-------------------------------------|-----------------------------|---------------------------|------------|------------|-------------|--------------|--------------|
| LS <sub>50</sub> -LS <sub>100</sub> | Size                        | Site-years                | 329        | 2325       | 3652        | 570          | 48           |
|                                     | Timing                      | SI [doy]                  | 172.90     | 164.42     | 156.36      | 151.31       | 149.42       |
|                                     |                             | LS <sub>50</sub> [doy]    | 291.86     | 291.20     | 288.15      | 282.21       | 270.65       |
|                                     |                             | LS <sub>100</sub> [doy]   | 290.30     | 290.05     | 291.77      | 296.65       | -            |
|                                     | Duration                    | LS <sub>50</sub> -SI [d]  | 118.96     | 126.80     | 131.79      | 130.92       | 121.23       |
|                                     |                             | LS <sub>100</sub> -SI [d] | 123.90     | 123.94     | 134.81      | 144.23       | -            |
|                                     | Cause                       | Stress                    | 0.77       | 0.66       | 0.61        | 0.66         | 0.94         |
|                                     |                             | Aging                     | 0.21       | 0.33       | 0.38        | 0.33         | 0.04         |
|                                     |                             | Both                      | 0.02       | 0.01       | 0.01        | 0.01         | 0.02         |
|                                     | Stressors SI                | Cold                      | 0.46       | 0.52       | 0.41        | 0.28         | 0.15         |
|                                     |                             | Photoperiod               | 0.54       | 0.48       | 0.58        | 0.71         | 0.85         |
|                                     |                             | Dry                       | 0.00       | 0.00       | 0.01        | 0.01         | 0.00         |
|                                     | Stressors LS <sub>50</sub>  | Cold                      | 0.56       | 0.64       | 0.57        | 0.41         | 0.12         |
|                                     |                             | Photoperiod               | 0.44       | 0.36       | 0.42        | 0.59         | 0.88         |
|                                     |                             | Dry                       | 0.00       | 0.00       | 0.00        | 0.01         | 0.00         |
|                                     | Stressors LS <sub>100</sub> | Cold                      | 0.06       | 0.11       | 0.15        | 0.20         | -            |
|                                     |                             | Photoperiod               | 0.94       | 0.89       | 0.85        | 0.80         | -            |
|                                     |                             | Dry                       | 0.00       | 0.00       | 0.00        | 0.00         | -            |
| LS <sub>50</sub>                    | Size                        | Site-years                | 334        | 2346       | 3620        | 542          | 45           |
|                                     | Timing                      | SI [doy]                  | 132.15     | 124.48     | 116.44      | 111.36       | 109.51       |
|                                     |                             | LS <sub>50</sub> [doy]    | 282.96     | 283.43     | 283.36      | 282.98       | 282.84       |
|                                     | Duration                    | LS <sub>50</sub> -SI [d]  | 150.81     | 158.95     | 166.92      | 171.62       | 173.33       |
|                                     | Cause                       | Stress                    | 0.99       | 1.00       | 0.96        | 0.91         | 0.93         |
|                                     |                             | Aging                     | 0.01       | 0.00       | 0.03        | 0.07         | 0.07         |
|                                     |                             | Both                      | 0.01       | 0.00       | 0.01        | 0.02         | 0.00         |
|                                     | Stressors SI                | Cold                      | 0.09       | 0.15       | 0.26        | 0.40         | 0.38         |
|                                     |                             | Photoperiod               | 0.91       | 0.85       | 0.74        | 0.60         | 0.62         |
|                                     |                             | Dry                       | 0.00       | 0.00       | 0.00        | 0.00         | 0.00         |
|                                     | Stressors LS <sub>50</sub>  | Cold                      | 0.00       | 0.00       | 0.00        | 0.01         | 0.01         |
|                                     |                             | Photoperiod               | 1.00       | 1.00       | 1.00        | 0.99         | 0.99         |
|                                     |                             | Dry                       | 0.00       | 0.00       | 0.00        | 0.00         | 0.00         |

*Note:* The summary is structured in the subjects bin size ('size'), timing, duration, cause, and stressors. Size is given by the count of the evaluated variable site-years. Timing is indicated by the mean day of year [doy] of senescence induction (SI) and of the stages when 50% and 100% of the leaves having turned color or having fallen (LS<sub>50</sub> and LS<sub>100</sub>, respectively). Duration refers to the periods from SI to LS<sub>50</sub> and to LS<sub>100</sub> (LS<sub>50</sub>-SI and LS<sub>100</sub>-SI, respectively) and is given in days [d]. Cause is assessed by the relative number of site-years during which aging versus stress induced senescence (i.e., reached their thresholds first), while the variable both refers to aging and stress reaching their thresholds on the same day. Stressors (i.e., cold stress, photoperiod stress, and dry stress) are compared by their relative contribution to the stress rate that has accumulated by SI, LS<sub>50</sub>, and LS<sub>100</sub>. The underlying model was calibrated with the LS<sub>50</sub>-LS<sub>100</sub> and LS<sub>50</sub> samples (Sect. 2.4).

**Table S6. Senescence summarized across mean annual Keetch and Byram drought index**

| Calibration                         | Subject                     | Variable                  | 2.7–23.5 | 23.5–44.2 | 44.2–65.0 | 65.0–85.7 | 85.7–107.0 |
|-------------------------------------|-----------------------------|---------------------------|----------|-----------|-----------|-----------|------------|
| LS <sub>50</sub> –LS <sub>100</sub> | Size                        | Site-years                | 6603     | 270       | 45        | 4         | 2          |
|                                     | Timing                      | SI [doy]                  | 159.65   | 154.16    | 153.60    | 156.50    | 150.00     |
|                                     |                             | LS <sub>50</sub> [doy]    | 288.63   | 290.92    | 291.98    | 297.00    | 291.50     |
|                                     |                             | LS <sub>100</sub> [doy]   | 291.15   | 292.92    | 303.33    | -         | -          |
|                                     | Duration                    | LS <sub>50</sub> –SI [d]  | 128.98   | 136.73    | 138.34    | 140.50    | 141.50     |
|                                     |                             | LS <sub>100</sub> –SI [d] | 129.21   | 139.84    | 148.67    | -         | -          |
|                                     | Cause                       | Stress                    | 0.65     | 0.50      | 0.36      | 0.50      | 0.50       |
|                                     |                             | Aging                     | 0.34     | 0.49      | 0.64      | 0.50      | 0.50       |
|                                     |                             | Both                      | 0.01     | 0.00      | 0.00      | 0.00      | 0.00       |
|                                     | Stressors SI                | Cold                      | 0.43     | 0.56      | 0.74      | 0.79      | 0.50       |
|                                     |                             | Photoperiod               | 0.56     | 0.43      | 0.26      | 0.21      | 0.50       |
|                                     |                             | Dry                       | 0.01     | 0.00      | 0.00      | 0.00      | 0.00       |
|                                     | Stressors LS <sub>50</sub>  | Cold                      | 0.57     | 0.71      | 0.77      | 0.92      | 1.00       |
|                                     |                             | Photoperiod               | 0.43     | 0.29      | 0.23      | 0.08      | 0.00       |
|                                     |                             | Dry                       | 0.00     | 0.00      | 0.00      | 0.00      | 0.00       |
|                                     | Stressors LS <sub>100</sub> | Cold                      | 0.13     | 0.14      | 0.35      | -         | -          |
|                                     |                             | Photoperiod               | 0.87     | 0.86      | 0.65      | -         | -          |
|                                     |                             | Dry                       | 0.00     | 0.00      | 0.00      | -         | -          |
| LS <sub>50</sub>                    | Size                        | Site-years                | 6578     | 263       | 39        | 5         | 2          |
|                                     | Timing                      | SI [doy]                  | 119.76   | 113.81    | 113.77    | 116.00    | 110.00     |
|                                     |                             | LS <sub>50</sub> [doy]    | 283.32   | 283.64    | 283.08    | 285.00    | 284.50     |
|                                     | Duration                    | LS <sub>50</sub> –SI [d]  | 163.56   | 169.83    | 169.31    | 169.00    | 174.50     |
|                                     | Cause                       | Stress                    | 0.97     | 0.94      | 0.85      | 1.00      | 1.00       |
|                                     |                             | Aging                     | 0.02     | 0.04      | 0.13      | 0.00      | 0.00       |
|                                     |                             | Both                      | 0.01     | 0.02      | 0.03      | 0.00      | 0.00       |
|                                     | Stressors SI                | Cold                      | 0.22     | 0.32      | 0.22      | 0.04      | 0.61       |
|                                     |                             | Photoperiod               | 0.78     | 0.68      | 0.78      | 0.96      | 0.39       |
|                                     |                             | Dry                       | 0.00     | 0.00      | 0.00      | 0.00      | 0.00       |
|                                     | Stressors LS <sub>50</sub>  | Cold                      | 0.00     | 0.00      | 0.00      | 0.00      | 0.00       |
|                                     |                             | Photoperiod               | 1.00     | 1.00      | 1.00      | 1.00      | 1.00       |
|                                     |                             | Dry                       | 0.00     | 0.00      | 0.00      | 0.00      | 0.00       |

Note: See Table S5.

**Table S7. Senescence summarized across latitude**

| Calibration                         | Subject                     | Variable                  | 45.8–48.3 °N | 48.3–50.7 °N | 50.7–53.1 °N | 53.1–55.6 °N | 55.6–58 °N |
|-------------------------------------|-----------------------------|---------------------------|--------------|--------------|--------------|--------------|------------|
| LS <sub>50</sub> -LS <sub>100</sub> | Size                        | Site-years                | 3709         | 1792         | 884          | 512          | 27         |
|                                     | Timing                      | SI [doy]                  | 160.66       | 157.82       | 157.32       | 159.14       | 160.96     |
|                                     |                             | LS <sub>50</sub> [doy]    | 283.32       | 294.36       | 294.96       | 298.69       | 275.42     |
|                                     |                             | LS <sub>100</sub> [doy]   | 289.14       | 295.61       | 296.53       | 293.06       | 290.43     |
|                                     | Duration                    | LS <sub>50</sub> -SI [d]  | 122.66       | 136.52       | 137.58       | 139.65       | 114.54     |
|                                     |                             | LS <sub>100</sub> -SI [d] | 124.34       | 141.34       | 141.64       | 135.67       | 130.33     |
|                                     | Cause                       | Stress                    | 0.79         | 0.48         | 0.48         | 0.42         | 0.96       |
|                                     |                             | Aging                     | 0.21         | 0.51         | 0.51         | 0.57         | 0.04       |
|                                     |                             | Both                      | 0.01         | 0.01         | 0.01         | 0.01         | 0.00       |
|                                     | Stressors SI                | Cold                      | 0.30         | 0.64         | 0.58         | 0.64         | 0.13       |
|                                     |                             | Photoperiod               | 0.70         | 0.36         | 0.41         | 0.35         | 0.87       |
|                                     |                             | Dry                       | 0.01         | 0.00         | 0.01         | 0.00         | 0.00       |
|                                     | Stressors LS <sub>50</sub>  | Cold                      | 0.41         | 0.78         | 0.72         | 0.89         | 0.19       |
|                                     |                             | Photoperiod               | 0.59         | 0.21         | 0.28         | 0.11         | 0.81       |
|                                     |                             | Dry                       | 0.00         | 0.00         | 0.00         | 0.00         | 0.00       |
|                                     | Stressors LS <sub>100</sub> | Cold                      | 0.10         | 0.14         | 0.20         | 0.17         | 0.10       |
|                                     |                             | Photoperiod               | 0.90         | 0.86         | 0.80         | 0.83         | 0.90       |
|                                     |                             | Dry                       | 0.00         | 0.00         | 0.00         | 0.00         | 0.00       |
| LS <sub>50</sub>                    | Size                        | Site-years                | 3722         | 1739         | 887          | 511          | 28         |
|                                     | Timing                      | SI [doy]                  | 120.85       | 117.89       | 117.16       | 119.05       | 120.68     |
|                                     |                             | LS <sub>50</sub> [doy]    | 283.29       | 283.37       | 283.43       | 283.34       | 283.71     |
|                                     | Duration                    | LS <sub>50</sub> -SI [d]  | 162.44       | 165.47       | 166.27       | 164.29       | 163.04     |
|                                     | Cause                       | Stress                    | 0.98         | 0.96         | 0.96         | 0.97         | 1.00       |
|                                     |                             | Aging                     | 0.02         | 0.03         | 0.03         | 0.03         | 0.00       |
|                                     |                             | Both                      | 0.01         | 0.01         | 0.01         | 0.01         | 0.00       |
|                                     | Stressors SI                | Cold                      | 0.21         | 0.26         | 0.25         | 0.22         | 0.12       |
|                                     |                             | Photoperiod               | 0.79         | 0.74         | 0.75         | 0.78         | 0.88       |
|                                     |                             | Dry                       | 0.00         | 0.00         | 0.00         | 0.00         | 0.00       |
|                                     | Stressors LS <sub>50</sub>  | Cold                      | 0.00         | 0.00         | 0.00         | 0.00         | 0.00       |
|                                     |                             | Photoperiod               | 1.00         | 1.00         | 1.00         | 1.00         | 1.00       |
|                                     |                             | Dry                       | 0.00         | 0.00         | 0.00         | 0.00         | 0.00       |

Note: See Table S5.

**Table S8. Senescence summarized across elevation**

| Calibration                         | Subject                     | Variable                  | –1–288 m | 288–576 m | 576–864 m | 864–1150 m | 1150–1440 m |
|-------------------------------------|-----------------------------|---------------------------|----------|-----------|-----------|------------|-------------|
| LS <sub>50</sub> –LS <sub>100</sub> | Size                        | Site-years                | 2023     | 2767      | 1329      | 666        | 139         |
|                                     | Timing                      | SI [doy]                  | 156.43   | 157.27    | 162.20    | 168.12     | 176.01      |
|                                     |                             | LS <sub>50</sub> [doy]    | 293.58   | 287.55    | 282.78    | 287.59     | 305.68      |
|                                     |                             | LS <sub>100</sub> [doy]   | 293.29   | 289.58    | 290.45    | 289.03     | -           |
|                                     | Duration                    | LS <sub>50</sub> –SI [d]  | 137.14   | 130.28    | 120.62    | 119.47     | 129.67      |
|                                     |                             | LS <sub>100</sub> –SI [d] | 137.61   | 131.46    | 123.19    | 123.08     | -           |
|                                     | Cause                       | Stress                    | 0.48     | 0.64      | 0.81      | 0.76       | 0.65        |
|                                     |                             | Aging                     | 0.50     | 0.35      | 0.19      | 0.23       | 0.33        |
|                                     |                             | Both                      | 0.01     | 0.01      | 0.01      | 0.01       | 0.01        |
|                                     | Stressors SI                | Cold                      | 0.55     | 0.41      | 0.32      | 0.41       | 0.77        |
|                                     |                             | Photoperiod               | 0.44     | 0.59      | 0.67      | 0.58       | 0.23        |
|                                     |                             | Dry                       | 0.00     | 0.01      | 0.00      | 0.00       | 0.00        |
|                                     | Stressors LS <sub>50</sub>  | Cold                      | 0.74     | 0.54      | 0.43      | 0.50       | 0.87        |
|                                     |                             | Photoperiod               | 0.26     | 0.46      | 0.56      | 0.49       | 0.13        |
|                                     |                             | Dry                       | 0.00     | 0.00      | 0.00      | 0.00       | 0.00        |
|                                     | Stressors LS <sub>100</sub> | Cold                      | 0.16     | 0.13      | 0.12      | 0.06       | -           |
|                                     |                             | Photoperiod               | 0.84     | 0.87      | 0.88      | 0.94       | -           |
|                                     |                             | Dry                       | 0.00     | 0.00      | 0.00      | 0.00       | -           |
| LS <sub>50</sub>                    | Size                        | Site-years                | 2018     | 2687      | 1368      | 681        | 133         |
|                                     | Timing                      | SI [doy]                  | 116.42   | 117.43    | 122.23    | 128.10     | 135.60      |
|                                     |                             | LS <sub>50</sub> [doy]    | 283.32   | 283.33    | 283.40    | 283.25     | 283.29      |
|                                     | Duration                    | LS <sub>50</sub> –SI [d]  | 166.90   | 165.90    | 161.17    | 155.15     | 147.68      |
|                                     | Cause                       | Stress                    | 0.95     | 0.97      | 0.98      | 1.00       | 1.00        |
|                                     |                             | Aging                     | 0.04     | 0.02      | 0.01      | 0.00       | 0.00        |
|                                     |                             | Both                      | 0.01     | 0.01      | 0.01      | 0.00       | 0.00        |
|                                     | Stressors SI                | Cold                      | 0.28     | 0.25      | 0.17      | 0.12       | 0.05        |
|                                     |                             | Photoperiod               | 0.72     | 0.75      | 0.83      | 0.88       | 0.95        |
|                                     |                             | Dry                       | 0.00     | 0.00      | 0.00      | 0.00       | 0.00        |
|                                     | Stressors LS <sub>50</sub>  | Cold                      | 0.00     | 0.00      | 0.00      | 0.00       | 0.00        |
|                                     |                             | Photoperiod               | 1.00     | 1.00      | 1.00      | 1.00       | 1.00        |
|                                     |                             | Dry                       | 0.00     | 0.00      | 0.00      | 0.00       | 0.00        |

*Note:* The bins of elevation are given in m a.s.l.. For further notes see Table S5.



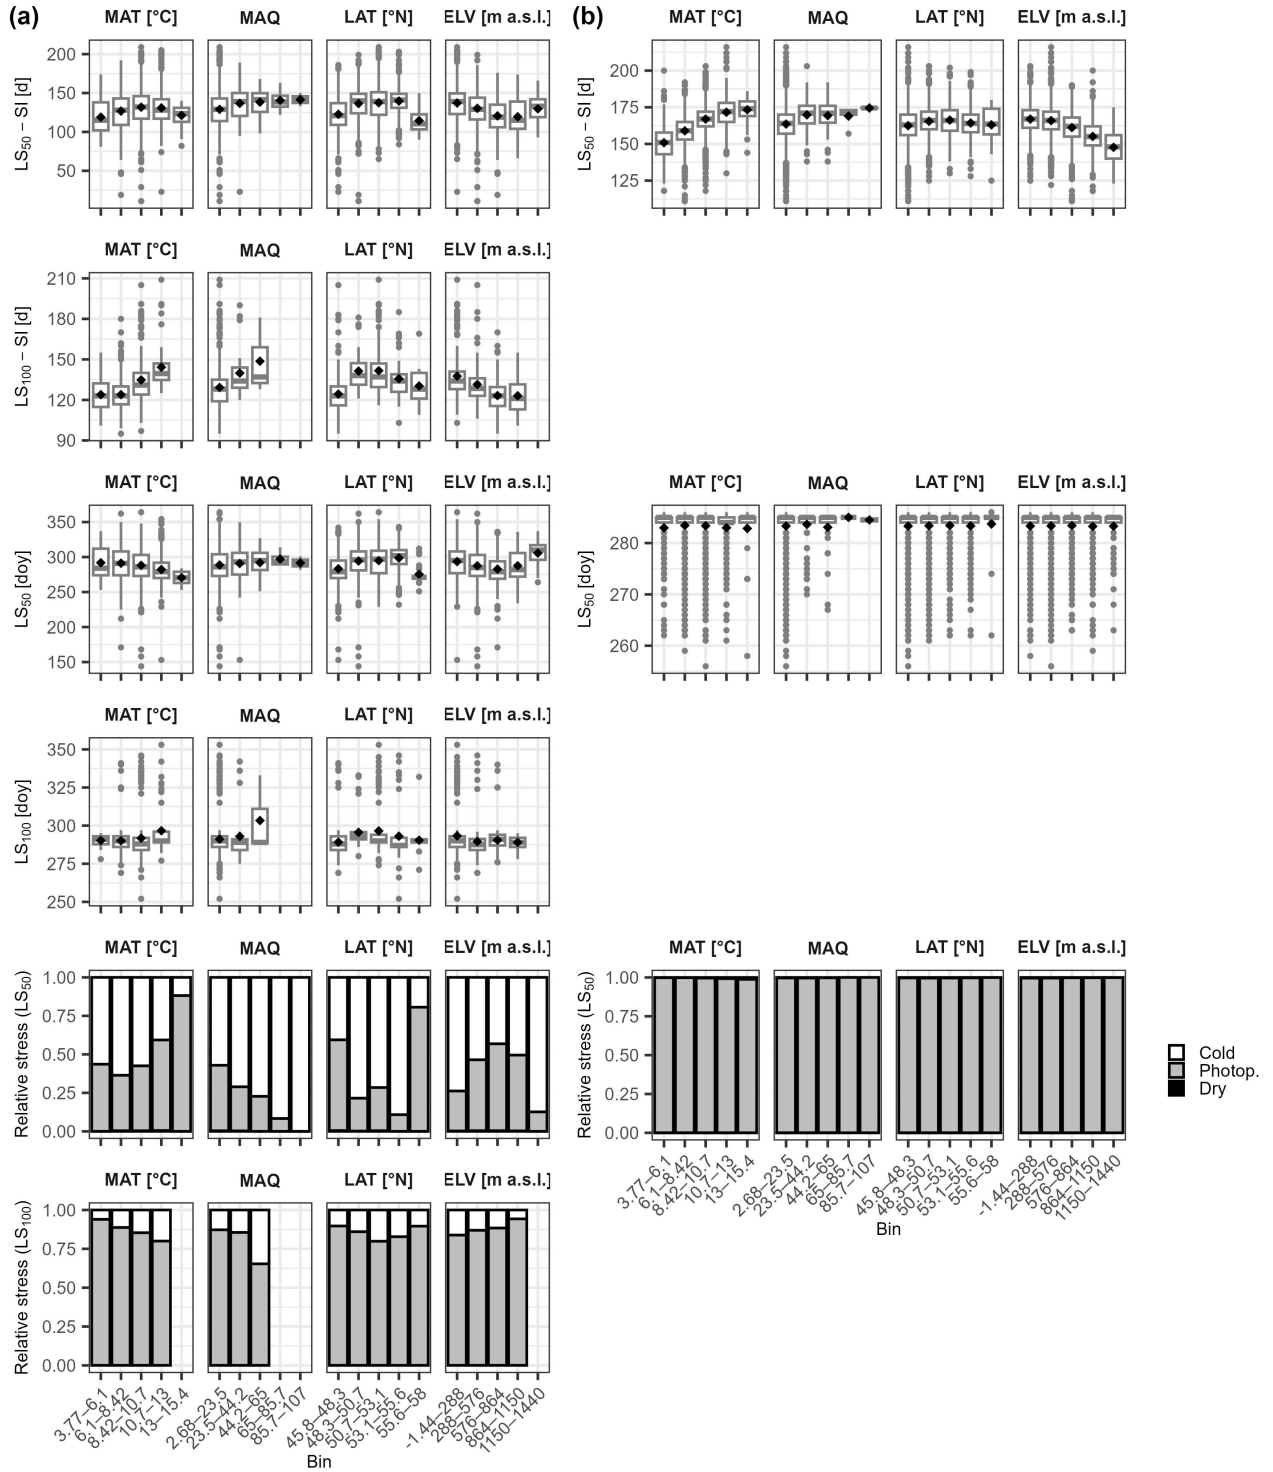

## S3.2 Model error

Table S9. Linear mixed-effects model (LMM) explaining the model error

| Coefficient                                                                                 | Value    | SE     | <i>t</i> statistic | <i>p</i> -value | BF <sub>01</sub> | Lower 0.5% | Upper 99.5% |
|---------------------------------------------------------------------------------------------|----------|--------|--------------------|-----------------|------------------|------------|-------------|
| Intercept                                                                                   | 8.1104   | 1.5297 | 5.3021             | <b>0.0000</b>   | <b>0.0000</b>    | 4.1700     | 12.0507     |
| CDD [d]                                                                                     | −1.8144  | 0.2367 | −7.6656            | <b>0.0000</b>   | <b>0.0000</b>    | −2.4241    | −1.2047     |
| DM2 [d]                                                                                     | −0.7348  | 0.2367 | −3.1043            | <b>0.0019</b>   | 0.0414           | −1.3445    | −0.1251     |
| PIA [d]                                                                                     | −0.6290  | 0.2509 | −2.5069            | 0.0122          | 0.1785           | −1.2754    | 0.0173      |
| DP3 <sub>LS<sub>50</sub></sub> [d]                                                          | 0.1038   | 0.2367 | 0.4385             | 0.6610          | 1.0000           | −0.5059    | 0.7135      |
| δMAT [d °C <sup>−1</sup> ]                                                                  | −2.0028  | 0.1306 | −15.3347           | <b>0.0000</b>   | <b>0.0000</b>    | −2.3393    | −1.6664     |
| δMAQ [d]                                                                                    | 0.0901   | 0.0179 | 5.0172             | <b>0.0000</b>   | <b>0.0000</b>    | 0.0438     | 0.1363      |
| δA <sub>net</sub> [d mol C <sup>−1</sup> m <sup>−2</sup> ]                                  | 0.4148   | 0.0160 | 25.9480            | <b>0.0000</b>   | <b>0.0000</b>    | 0.3736     | 0.4560      |
| δLAT [d °C <sup>−1</sup> ]                                                                  | 2.1126   | 0.4724 | 4.4725             | <b>0.0000</b>   | <b>0.0003</b>    | 0.8959     | 3.3294      |
| δELV [d m <sup>−1</sup> ]                                                                   | 0.0113   | 0.0031 | 3.6690             | <b>0.0002</b>   | <i>0.0072</i>    | 0.0034     | 0.0193      |
| SUI [d]                                                                                     | −6.1036  | 1.8142 | −3.3643            | <b>0.0008</b>   | 0.0193           | −10.7770   | −1.4302     |
| GER [d]                                                                                     | −7.8265  | 2.2319 | −3.5067            | <b>0.0005</b>   | 0.0124           | −13.5758   | −2.0772     |
| GBR [d]                                                                                     | −24.6277 | 2.9215 | −8.4297            | <b>0.0000</b>   | <b>0.0000</b>    | −32.1534   | −17.1020    |
| CDD × δMAT [d °C <sup>−1</sup> ]                                                            | −0.1457  | 0.1887 | −0.7720            | 0.4401          | 1.0000           | −0.6318    | 0.3404      |
| DM2 × δMAT [d °C <sup>−1</sup> ]                                                            | −0.1771  | 0.1887 | −0.9386            | 0.3480          | 1.0000           | −0.6632    | 0.3090      |
| PIA × δMAT [d °C <sup>−1</sup> ]                                                            | 0.0961   | 0.1888 | 0.5092             | 0.6106          | 1.0000           | −0.3901    | 0.5824      |
| DP3 <sub>LS<sub>50</sub></sub> × δMAT [d °C <sup>−1</sup> ]                                 | −0.0431  | 0.1887 | −0.2283            | 0.8194          | 1.0000           | −0.5292    | 0.4430      |
| CDD × δMAQ [d]                                                                              | −0.0537  | 0.0276 | −1.9495            | 0.0512          | 0.4806           | −0.1247    | 0.0173      |
| DM2 × δMAQ [d]                                                                              | −0.0502  | 0.0276 | −1.8225            | 0.0684          | 0.5709           | −0.1212    | 0.0208      |
| PIA × δMAQ [d]                                                                              | −0.0474  | 0.0281 | −1.6869            | 0.0916          | 0.6704           | −0.1197    | 0.0250      |
| DP3 <sub>LS<sub>50</sub></sub> × δMAQ [d]                                                   | −0.0147  | 0.0276 | −0.5332            | 0.5939          | 1.0000           | −0.0857    | 0.0563      |
| CDD × δA <sub>net</sub> [d mol C <sup>−1</sup> m <sup>−2</sup> ]                            | 0.0173   | 0.0236 | 0.7323             | 0.4640          | 1.0000           | −0.0435    | 0.0781      |
| DM2 × δA <sub>net</sub> [d mol C <sup>−1</sup> m <sup>−2</sup> ]                            | 0.0093   | 0.0236 | 0.3958             | 0.6922          | 1.0000           | −0.0515    | 0.0702      |
| PIA × δA <sub>net</sub> [d mol C <sup>−1</sup> m <sup>−2</sup> ]                            | 0.0466   | 0.0236 | 1.9739             | 0.0484          | 0.4639           | −0.0142    | 0.1074      |
| DP3 <sub>LS<sub>50</sub></sub> × δA <sub>net</sub> [d mol C <sup>−1</sup> m <sup>−2</sup> ] | −0.0031  | 0.0236 | −0.1327            | 0.8945          | 1.0000           | −0.0639    | 0.0577      |
| CDD × δLAT [d °C <sup>−1</sup> ]                                                            | −0.0573  | 0.1376 | −0.4162            | 0.6773          | 1.0000           | −0.4117    | 0.2972      |
| DM2 × δLAT [d °C <sup>−1</sup> ]                                                            | −0.0665  | 0.1376 | −0.4830            | 0.6291          | 1.0000           | −0.4209    | 0.2880      |
| PIA × δLAT [d °C <sup>−1</sup> ]                                                            | −0.0344  | 0.1378 | −0.2495            | 0.8030          | 1.0000           | −0.3892    | 0.3205      |
| DP3 <sub>LS<sub>50</sub></sub> × δLAT [d °C <sup>−1</sup> ]                                 | 0.0172   | 0.1376 | 0.1252             | 0.9004          | 1.0000           | −0.3372    | 0.3716      |
| CDD × δELV [d m <sup>−1</sup> ]                                                             | −0.0012  | 0.0013 | −0.9438            | 0.3453          | 1.0000           | −0.0045    | 0.0021      |
| DM2 × δELV [d m <sup>−1</sup> ]                                                             | −0.0011  | 0.0013 | −0.8856            | 0.3759          | 1.0000           | −0.0044    | 0.0021      |
| PIA × δELV [d m <sup>−1</sup> ]                                                             | −0.0014  | 0.0013 | −1.0789            | 0.2806          | 0.9940           | −0.0046    | 0.0019      |
| DP3 <sub>LS<sub>50</sub></sub> × δELV [d m <sup>−1</sup> ]                                  | 0.0000   | 0.0013 | 0.0139             | 0.9889          | 1.0000           | −0.0032    | 0.0033      |

Note: The LMM was fitted to the response variable ‘model error’ [i.e.,  $x_{s,i} - x_{o,i}$ , the difference in days calculated as the predicted minus the observed date for each stage and site-year (*i*)] in the validation sample (Sect. 2.6 and S2.3), based on 41 068 observations, and resulted in an adjusted R<sup>2</sup> of 0.44 and a proportion of the deviance explained of 0.44. The random intercepts were grouped by site with  $\sigma_b = 9.32$  d (99% confidence interval  $8.26 \leq \sigma_b \leq 10.52$  d). SE is the standard error, while ‘Lower 0.05%’ and ‘Upper 99.5%’ indicate the lower and upper boundaries of the 99% confidence interval. Bold *p*-values are indicate significant fixed effects at  $\alpha = 0.01$  (i.e.,  $p \leq 0.005$  for a two-sided hypothesis test), bold and italic minimum Bayes factors (BF<sub>01</sub>) indicate decisive and very strong fixed effects (i.e.,  $BF_{01} \leq 1/1000$  and  $BF_{01} \leq 1/100$ , respectively). The intercept represents the base line, i.e., the model error according to the Null model for the reference level Austria. CDD, DM2, PIA, and DP3 are the factorized models, while SUI, GER, and GBR are the factorized countries Switzerland, Germany, and Great Britain, respectively. The random intercepts were grouped by ‘site’. All models were calibrated and validated with the LS<sub>50</sub> sample (Sect. 2.4).

**Table S10. Interacting effects according to the LMM**

| Variable                                                               | Model               | Country | Estimate | SE   | 0.5 %  | 99.5 % | Equation                                                                               |
|------------------------------------------------------------------------|---------------------|---------|----------|------|--------|--------|----------------------------------------------------------------------------------------|
| Country<br>[d]                                                         | Null                | AUT     | 8.11     | 1.53 | 4.17   | 12.05  | $\beta_0$                                                                              |
|                                                                        |                     | SUI     | 2.01     | 1.50 | -1.86  | 5.87   | $\beta_0 + \text{SUI}$                                                                 |
|                                                                        |                     | GER     | 0.28     | 1.34 | -3.16  | 3.73   | $\beta_0 + \text{GER}$                                                                 |
|                                                                        |                     | GBR     | -16.52   | 2.02 | -21.71 | -11.32 | $\beta_0 + \text{GBR}$                                                                 |
|                                                                        | CDD                 | AUT     | 6.30     | 1.55 | 2.31   | 10.28  | $\beta_0 + \text{CDD}$                                                                 |
|                                                                        |                     | SUI     | 0.19     | 1.52 | -3.72  | 4.11   | $\beta_0 + \text{CDD} + \text{SUI}$                                                    |
|                                                                        |                     | GER     | -1.53    | 1.33 | -4.96  | 1.90   | $\beta_0 + \text{CDD} + \text{GER}$                                                    |
|                                                                        |                     | GBR     | -18.33   | 2.00 | -23.49 | -13.17 | $\beta_0 + \text{CDD} + \text{GBR}$                                                    |
|                                                                        | DM2                 | AUT     | 7.38     | 1.55 | 3.39   | 11.36  | $\beta_0 + \text{DM2}$                                                                 |
|                                                                        |                     | SUI     | 1.27     | 1.52 | -2.64  | 5.18   | $\beta_0 + \text{DM2} + \text{SUI}$                                                    |
|                                                                        |                     | GER     | -0.45    | 1.33 | -3.88  | 2.98   | $\beta_0 + \text{DM2} + \text{GER}$                                                    |
|                                                                        |                     | GBR     | -17.25   | 2.00 | -22.41 | -12.09 | $\beta_0 + \text{DM2} + \text{GBR}$                                                    |
|                                                                        | PIA                 | AUT     | 7.48     | 1.52 | 3.56   | 11.41  | $\beta_0 + \text{PIA}$                                                                 |
|                                                                        |                     | SUI     | 1.38     | 1.49 | -2.47  | 5.23   | $\beta_0 + \text{PIA} + \text{SUI}$                                                    |
|                                                                        |                     | GER     | -0.35    | 1.36 | -3.84  | 3.15   | $\beta_0 + \text{PIA} + \text{GER}$                                                    |
|                                                                        |                     | GBR     | -17.15   | 2.04 | -22.40 | -11.89 | $\beta_0 + \text{PIA} + \text{GBR}$                                                    |
|                                                                        | DP3 <sub>LS50</sub> | AUT     | 8.21     | 1.55 | 4.23   | 12.20  | $\beta_0 + \text{DP3}_{\text{LS50}}$                                                   |
|                                                                        |                     | SUI     | 2.11     | 1.52 | -1.80  | 6.02   | $\beta_0 + \text{DP3}_{\text{LS50}} + \text{SUI}$                                      |
|                                                                        |                     | GER     | 0.39     | 1.33 | -3.05  | 3.82   | $\beta_0 + \text{DP3}_{\text{LS50}} + \text{GER}$                                      |
|                                                                        |                     | GBR     | -16.41   | 2.00 | -21.57 | -11.25 | $\beta_0 + \text{DP3}_{\text{LS50}} + \text{GBR}$                                      |
| $\delta\text{ELV}$<br>[d 100 m <sup>-1</sup> ]                         | Null                | AC      | 1.13     | 0.31 | 0.34   | 1.93   | 100 $\delta\text{ELV}$                                                                 |
|                                                                        | CDD                 |         | 1.01     | 0.32 | 0.20   | 1.83   | 100 ( $\delta\text{ELV} + \text{CDD} \times \delta\text{ELV}$ )                        |
|                                                                        | DM2                 |         | 1.02     | 0.32 | 0.20   | 1.84   | 100 ( $\delta\text{ELV} + \text{DM2} \times \delta\text{ELV}$ )                        |
|                                                                        | PIA                 |         | 1.00     | 0.32 | 0.18   | 1.82   | 100 ( $\delta\text{ELV} + \text{PIA} \times \delta\text{ELV}$ )                        |
|                                                                        | DP3 <sub>LS50</sub> |         | 1.14     | 0.32 | 0.32   | 1.95   | 100 ( $\delta\text{ELV} + \text{DP3}_{\text{LS50}} \times \delta\text{ELV}$ )          |
| $\delta\text{LAT}$<br>[d °N <sup>-1</sup> ]                            | Null                |         | 2.11     | 0.47 | 0.90   | 3.33   | $\delta\text{LAT}$                                                                     |
|                                                                        | CDD                 |         | 2.06     | 0.48 | 0.82   | 3.29   | $\delta\text{LAT} + \text{CDD} \times \delta\text{LAT}$                                |
|                                                                        | DM2                 |         | 2.05     | 0.48 | 0.81   | 3.28   | $\delta\text{LAT} + \text{DM2} \times \delta\text{LAT}$                                |
|                                                                        | PIA                 |         | 2.08     | 0.48 | 0.84   | 3.31   | $\delta\text{LAT} + \text{PIA} \times \delta\text{LAT}$                                |
|                                                                        | DP3 <sub>LS50</sub> |         | 2.13     | 0.48 | 0.90   | 3.36   | $\delta\text{LAT} + \text{DP3}_{\text{LS50}} \times \delta\text{LAT}$                  |
| $\delta\text{MAQ}$<br>[d 100 <sup>-1</sup> ]                           | Null                |         | 9.01     | 1.79 | 4.38   | 13.63  | 100 $\delta\text{MAQ}$                                                                 |
|                                                                        | CDD                 |         | 3.63     | 2.29 | -2.28  | 9.54   | 100 ( $\delta\text{MAQ} + \text{CDD} \times \delta\text{MAQ}$ )                        |
|                                                                        | DM2                 |         | 3.98     | 2.29 | -1.93  | 9.89   | 100 ( $\delta\text{MAQ} + \text{DM2} \times \delta\text{MAQ}$ )                        |
|                                                                        | PIA                 |         | 4.27     | 2.37 | -1.83  | 10.37  | 100 ( $\delta\text{MAQ} + \text{PIA} \times \delta\text{MAQ}$ )                        |
|                                                                        | DP3 <sub>LS50</sub> |         | 7.54     | 2.29 | 1.63   | 13.45  | 100 ( $\delta\text{MAQ} + \text{DP3}_{\text{LS50}} \times \delta\text{MAQ}$ )          |
| $\delta\text{MAT}$<br>[d 10°C <sup>-1</sup> ]                          | Null                |         | -20.03   | 1.31 | -23.39 | -16.66 | 10 $\delta\text{MAT}$                                                                  |
|                                                                        | CDD                 |         | -21.49   | 1.69 | -25.84 | -17.13 | 10 ( $\delta\text{MAT} + \text{CDD} \times \delta\text{MAT}$ )                         |
|                                                                        | DM2                 |         | -21.80   | 1.69 | -26.16 | -17.44 | 10 ( $\delta\text{MAT} + \text{DM2} \times \delta\text{MAT}$ )                         |
|                                                                        | PIA                 |         | -19.07   | 1.69 | -23.43 | -14.71 | 10 ( $\delta\text{MAT} + \text{PIA} \times \delta\text{MAT}$ )                         |
|                                                                        | DP3 <sub>LS50</sub> |         | -20.46   | 1.69 | -24.82 | -16.10 | 10 ( $\delta\text{MAT} + \text{DP3}_{\text{LS50}} \times \delta\text{MAT}$ )           |
| $\delta A_{\text{net}}$<br>[d 10 mol C <sup>-1</sup> m <sup>-2</sup> ] | Null                |         | 4.15     | 0.16 | 3.74   | 4.56   | 10 $\delta A_{\text{net}}$                                                             |
|                                                                        | CDD                 |         | 4.32     | 0.21 | 3.78   | 4.86   | 10 ( $\delta A_{\text{net}} + \text{CDD} \times \delta A_{\text{net}}$ )               |
|                                                                        | DM2                 |         | 4.24     | 0.21 | 3.70   | 4.78   | 10 ( $\delta A_{\text{net}} + \text{DM2} \times \delta A_{\text{net}}$ )               |
|                                                                        | PIA                 |         | 4.61     | 0.21 | 4.08   | 5.15   | 10 ( $\delta A_{\text{net}} + \text{PIA} \times \delta A_{\text{net}}$ )               |
|                                                                        | DP3 <sub>LS50</sub> |         | 4.12     | 0.21 | 3.58   | 4.65   | 10 ( $\delta A_{\text{net}} + \text{DP3}_{\text{LS50}} \times \delta A_{\text{net}}$ ) |

*Note:* The interacting effects of the LMM (Table S9) were calculated with the Delta method (Chpt. 5.1.4 in Fox and Weisberg, 2019; Chpt. 9.9 in Wasserman, 2004) according to the displayed equation, together with their standard error (SE) and 99% confidence interval (i.e., the 0.5% lower bound and 99.5% upper bound). AUT, SUI, GER, and GBR refer to the countries Austria, Switzerland, Germany, and Great Britain, respectively, while AC marks estimates across countries. The unit for  $\delta A_{\text{net}}$  is d 10 mol C<sup>-1</sup> m<sup>-2</sup>.

**Table S11. Impact on the variance in the model error explained by the LMM**

| Explanatory variable                   | Impact | Accumulated | <i>p</i> -value | <b>BF<sub>01</sub></b> |
|----------------------------------------|--------|-------------|-----------------|------------------------|
| Site                                   | 0.9164 | 0.9164      | <b>0.0000</b>   | <b>0.0000</b>          |
| $\delta A_{\text{net}}$                | 0.0591 | 0.9755      | <b>0.0000</b>   | <b>0.0000</b>          |
| $\delta \text{MAT}$                    | 0.0195 | 0.9950      | <b>0.0000</b>   | <b>0.0000</b>          |
| Model                                  | 0.0032 | 0.9982      | <b>0.0000</b>   | <b>0.0000</b>          |
| $\delta \text{MAQ}$                    | 0.0011 | 0.9993      | <b>0.0000</b>   | <b>0.0000</b>          |
| Model $\times$ $\delta \text{MAQ}$     | 0.0003 | 0.9996      | 0.1799          | 0.8997                 |
| Model $\times$ $\delta A_{\text{net}}$ | 0.0002 | 0.9998      | 0.3213          | 1.0000                 |
| Model $\times$ $\delta \text{MAT}$     | 0.0001 | 0.9999      | 0.7026          | 1.0000                 |
| Model $\times$ $\delta \text{ELV}$     | 0.0001 | 1.0000      | 0.7110          | 1.0000                 |
| $\delta \text{LAT}$                    | 0.0000 | 1.0000      | <b>0.0000</b>   | <b>0.0000</b>          |
| $\delta \text{ELV}$                    | 0.0000 | 1.0000      | <b>0.0000</b>   | <b>0.0000</b>          |
| Country                                | 0.0000 | 1.0000      | <b>0.0000</b>   | <b>0.0000</b>          |
| Model $\times$ $\delta \text{LAT}$     | 0.0000 | 1.0000      | 0.9770          | 1.0000                 |

*Note:* The type-III analysis of variance (ANOVA; Sect. 2.6 and S2.3) was based on the LMM (Table S9) and thus on 54 834 observations. For each explanatory variable (i.e., fixed and random effects), the impact on the variance in the model error as explained by the LMM is given, together with the accumulated impact when ordered by impact. Bold *p*-values are significant at  $\alpha = 0.01$  (i.e.,  $p \leq 0.01$  for a one-sided hypothesis test) and bold minimum Bayes factors (**BF<sub>01</sub>**) are decisive (i.e.,  $\text{BF}_{01} \leq 1/1000$ ).

## References

- Akaike, H.: A new look at the statistical model identification, *IEEE Trans. Autom. Control*, 19, 716–723, <https://doi.org/10.1109/TAC.1974.1100705>, 1974.
- Baayen, R. H., Davidson, D. J., and Bates, D. M.: Mixed-effects modeling with crossed random effects for subjects and items, *J. Mem. Lang.*, 59, 390–412, <https://doi.org/10.1016/j.jml.2007.12.005>, 2008.
- Brock, T. D.: Calculating solar radiation for ecological studies, *Ecol. Model.*, 14, 1–19, [https://doi.org/10.1016/0304-3800\(81\)90011-9](https://doi.org/10.1016/0304-3800(81)90011-9), 1981.
- Burnham, K. P. and Anderson, D. R.: Multimodel Inference: Understanding AIC and BIC in Model Selection, *Sociol. Methods Res.*, 33, 261–304, <https://doi.org/10.1177/0049124104268644>, 2004.
- Candelieri, A.: A gentle introduction to Bayesian Optimization, 2021 Winter Simulation Conference (WSC), Phoenix, AZ, and virtual, 1–16, <https://doi.org/10.1109/WSC52266.2021.9715413>, 2021.
- Collatz, G. J., Ball, J. T., Grivet, C., and Berry, J. A.: Physiological and environmental-regulation of stomatal conductance, photosynthesis and transpiration - A model that includes laminar boundary-layer, *Agric. For. Meteorol.*, 54, 107–136, [https://doi.org/10.1016/0168-1923\(91\)90002-8](https://doi.org/10.1016/0168-1923(91)90002-8), 1991.
- Farquhar, G. D., von Caemmerer, S., and Berry, J. A.: A biochemical model of photosynthetic CO<sub>2</sub> assimilation in leaves of C<sub>3</sub> species, *Planta*, 149, 78–90, <https://doi.org/10.1007/bf00386231>, 1980.
- Fisher, R. A. and Russell, E. J.: On the mathematical foundations of theoretical statistics, *Philos. Trans. R. Soc. Lond. Ser. Contain. Pap. Math. Phys. Character*, 222, 309–368, <https://doi.org/10.1098/rsta.1922.0009>, 1997.
- Foster, G. R., McCool, D. K., Renard, K. G., and Moldenhauer, W. C.: Conversion of the universal soil loss equation to SI metric units, *J. Soil Water Conserv.*, 36, 355–359, 1981.
- Fox, J. and Weisberg, S.: *An R Companion to Applied Regression*, Third., SAGE, Los Angeles, 2019.
- Geodesy: Approximate formulas for the transformation between Swiss projection coordinates and WGS84, 2016.
- Gerten, D., Schaphoff, S., Haberlandt, U., Lucht, W., and Sitch, S.: Terrestrial vegetation and water balance - hydrological evaluation of a dynamic global vegetation model, *J. Hydrol.*, 286, 249–270, <https://doi.org/10.1016/j.jhydrol.2003.09.029>, 2004.
- Gupta, H. V., Kling, H., Yilmaz, K. K., and Martinez, G. F.: Decomposition of the mean squared error and NSE performance criteria: Implications for improving hydrological modelling, *J. Hydrol.*, 377, 80–91, <https://doi.org/10.1016/j.jhydrol.2009.08.003>, 2009.

- Haxeltine, A. and Prentice, I. C.: BIOME3: An equilibrium terrestrial biosphere model based on ecophysiological constraints, resource availability, and competition among plant functional types, *Glob. Biogeochem. Cycles*, 10, 693–709, <https://doi.org/10.1029/96gb02344>, 1996.
- Haxeltine, A., Prentice, I. C., and Creswell, D. I.: A coupled carbon and water flux model to predict vegetation structure, *J. Veg. Sci.*, 7, 651–666, <https://doi.org/10.2307/3236377>, 1996.
- Keetch, J. J. and Byram, G. M.: A Drought Index for Forest Fire Control, Department of Agriculture, Forest Service, Southeastern Forest Experiment Station, Asheville, NC: U.S., 1968.
- Kling, H., Fuchs, M., and Paulin, M.: Runoff conditions in the upper Danube basin under an ensemble of climate change scenarios, *J. Hydrol.*, 424–425, 264–277, <https://doi.org/10.1016/j.jhydrol.2012.01.011>, 2012.
- Kloos, S., Klosterhalfen, A., Knohl, A., and Menzel, A.: Decoding autumn phenology: Unraveling the link between observation methods and detected environmental cues, *Glob. Change Biol.*, 30, e17231, <https://doi.org/10.1111/gcb.17231>, 2024.
- Lu, X. and Keenan, T. F.: No evidence for a negative effect of growing season photosynthesis on leaf senescence timing, *Glob. Change Biol.*, 28, 3083–3093, <https://doi.org/10.1111/gcb.16104>, 2022.
- Maes, F., Wehenkel, L., and Ernst, D.: Meta-learning of exploration/exploitation strategies: The Multi-armed bandit case, *Agents and Artificial Intelligence*, 100–115, 2013.
- Meier, M. and Bigler, C.: Process-oriented models of autumn leaf phenology: ways to sound calibration and implications of uncertain projections, *Geosci. Model Dev.*, 16, 7171–7201, <https://doi.org/10.5194/gmd-16-7171-2023>, 2023.
- Swiss phenology network: <https://www.meteoswiss.admin.ch/weather/measurement-systems/land-based-stations/swiss-phenology-network.html>, last access: 29 January 2025.
- Pinheiro, J. C. and Bates, D. M.: Mixed-effects models in S and S-PLUS, Springer, New York, 528 S. pp., 2000.
- R Core Team: R: A language and environment for statistical computing, 2025.
- Shaw, H. G.: Centigrade-Fahrenheit temperature conversion, *J. Chem. Educ.*, 8, 727, 1931.
- Sitch, S., Prentice, I. C., Smith, B., Cramer, W., Kaplan, J. O., Lucht, W., Sykes, M. T., Thonicke, K., and Venevsky, S.: LPJ - A Coupled Model Of Vegetation Dynamics And The Terrestrial Carbon Cycle. <https://www.researchgate.net/publication/37456884>, 2000.
- Wang, H., Gao, C., and Ge, Q.: Low temperature and short daylength interact to affect the leaf senescence of two temperate tree species, *Tree Physiol.*, 42, 2252–2265, <https://doi.org/10.1093/treephys/tpac068>, 2022.
- Wasserman, L.: All of Statistics. A Concise Course in Statistical Inference, 1st ed., Springer New York, NY, 2004.
- Wohlfahrt, G. and Gu, L.: The many meanings of gross photosynthesis and their implication for photosynthesis research from leaf to globe, *Plant Cell Environ.*, 38, 2500–2507, <https://doi.org/10.1111/pce.12569>, 2015.
- Wood, S. N.: Fast stable restricted maximum likelihood and marginal likelihood estimation of semiparametric generalized linear models, *J. R. Stat. Soc. Ser. B Stat. Methodol.*, 73, 3–36, <https://doi.org/10.1111/j.1467-9868.2010.00749.x>, 2011.
- Wood, S. N.: Generalized additive models: An introduction with R, 2nd edition., Chapman and Hall/CRC, New York, 2017.
- Woods, H. W.: Centigrade-fahrenheit temperature conversion, *J. Chem. Educ.*, 8, 370, 1931.
- Xiang, Y., Sun, D. Y., Fan, W., and Gong, X. G.: Generalized Simulated Annealing algorithm and its application to the Thomson model, *Phys. Lett. A*, 233, 216–220, [https://doi.org/10.1016/s0375-9601\(97\)00474-x](https://doi.org/10.1016/s0375-9601(97)00474-x), 1997.
- Xiang, Y., Gubian, S., and Martin, F.: Generalized Simulated Annealing, in: *Computational Optimization in Engineering - Paradigms and Applications*, 25–46, 2017.
- Yates, F.: The analysis of multiple classifications with unequal numbers in the different classes, *J. Am. Stat. Assoc.*, 29, 51–66, <https://doi.org/10.2307/2278459>, 1934.
- Zani, D., Crowther, T. W., Mo, L., Renner, S. S., and Zohner, C. M.: Increased growing-season productivity drives earlier autumn leaf senescence in temperate trees, *Science*, 370, 1066–1071, <https://doi.org/10.1126/science.abd8911>, 2020.
